# Supplementary material
Source: PubMed Central journal article supplement (PMC3308747)

**Supplemental figure 1: *in vitro* growth inhibition assay of *B. canis*** using antibodies against Bc28.1 (rabbit serum and monoclonal antibody 6C9). Result for each antibody is expressed as % of growth in regards to appropriate control (pre-immune serum or unrelated mAb). The unrelated inhibitory serum (antiBcVir15) is directed against an intracellular protein from *B. canis* (23). Neither rabbit serum nor mAb against Bc28.1 significantly inhibit the *in vitro* growth of parasites.

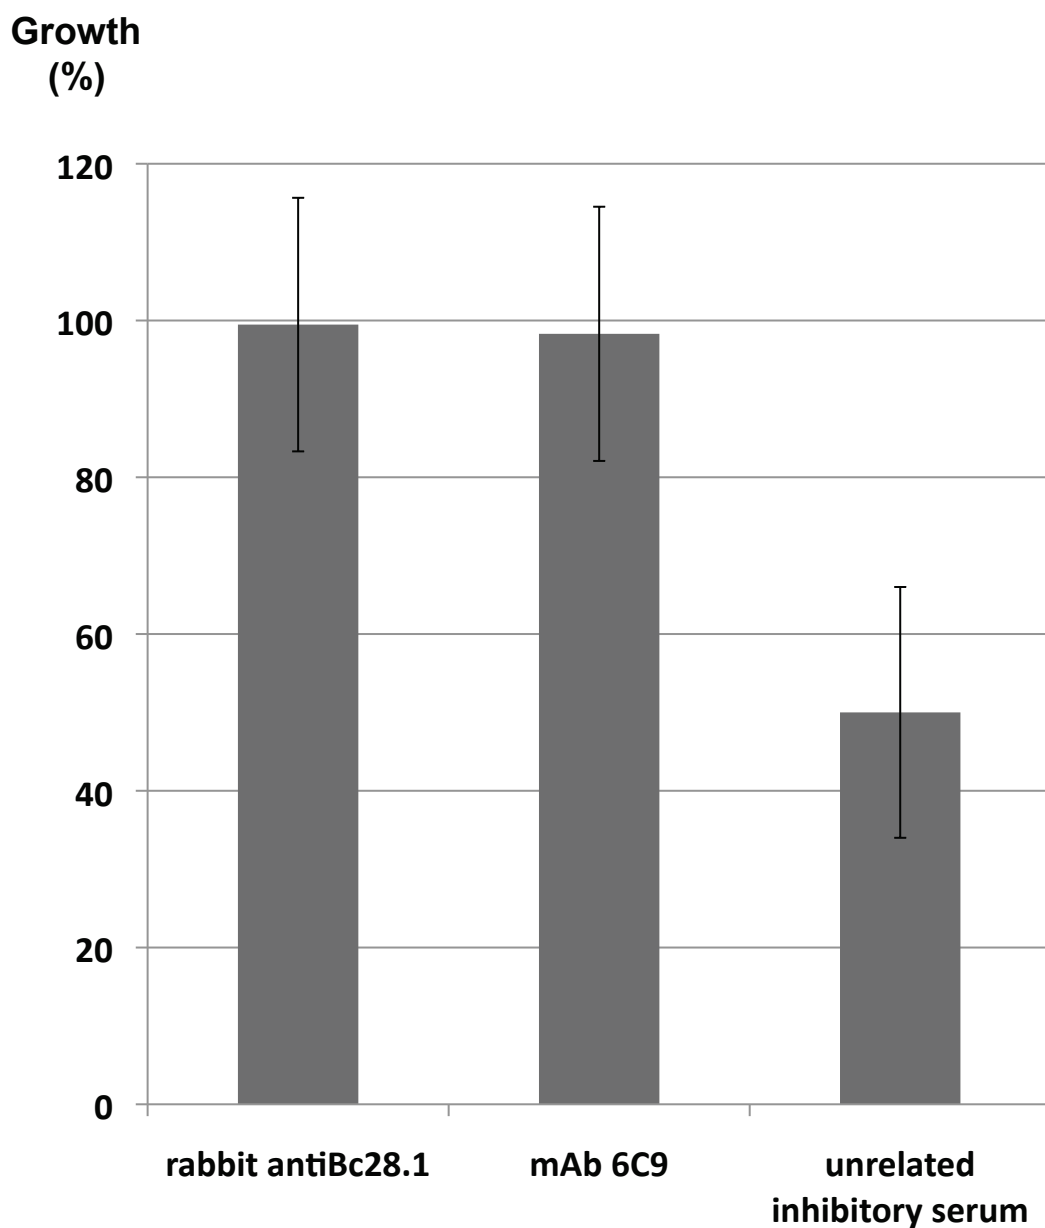

Supplement: supp_M111.260745_jbc.M111.260745-1.pdf [file supp_M111.260745_jbc.M111.260745-1.pdf]
