# Supplementary material
Source: PubMed Central journal article supplement (PMC3308747)

**Supplemental Figure 2. Heteronuclear  $^{15}\text{N}\{^1\text{H}\}$  NOE ratios** measured at 700 MHz, 37°C and pH 6.5 on a 0.5 mM  $^{15}\text{N}$ -uniformly labeled sample of Bc28.1.

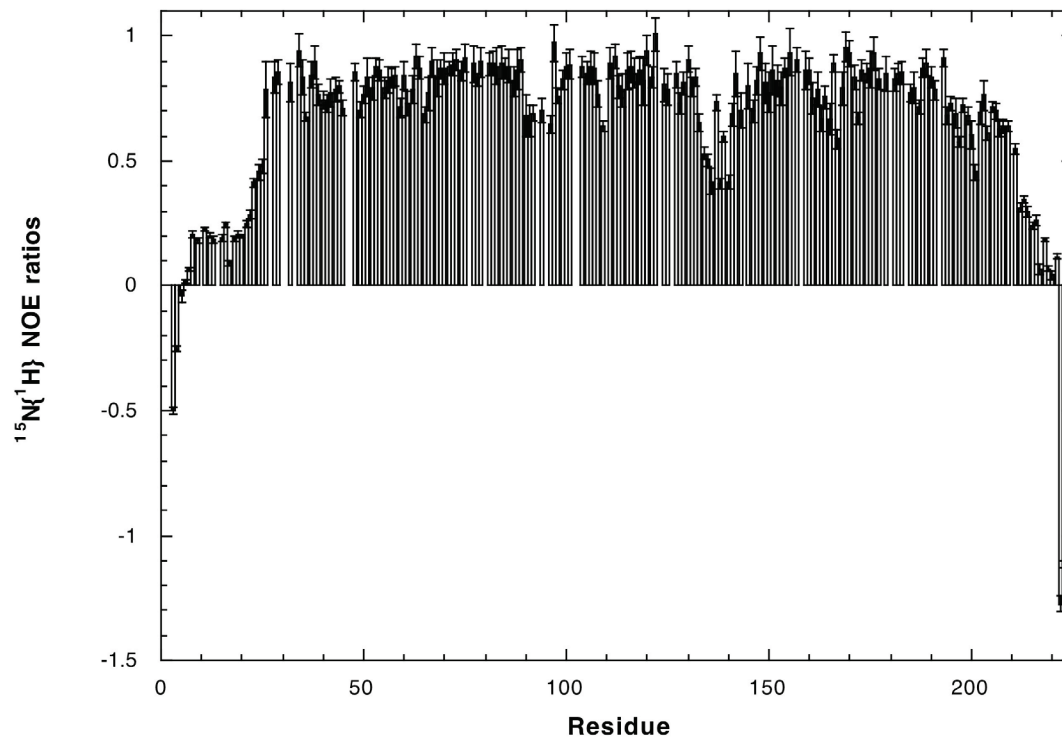

Supplement: supp_M111.260745_jbc.M111.260745-2.pdf [file supp_M111.260745_jbc.M111.260745-2.pdf]
