# Supplementary material
Source: PubMed Central journal article supplement (PMC3308747)

**Supplemental Figure 3: erythrocyte binding analysis of Bc28.1 mutants.** (A) Views of the electrostatic surface potential of Bc28.1\_HRKKAla (leftmost panel) and Bc28.1\_HRKKGlu (rightmost panel) calculated using MOLMOL. Only one face is presented for the two mutants: the one that bears the basic patch in the wild-type protein (Fig. 10A, same parameters for electrostatic potential calculation). The basic patch was disrupted by replacing 4 basic residues either by alanine (Bc28.1\_HRKKAla) or glutamic acid (Bc28.1\_HRKKGlu). Binding assays were performed with 50  $\mu$ L of packed dog erythrocytes. His-GFP and full-length Bc28.1 recombinant proteins were used as negative and positive control, respectively. (B) Input protein samples revealed by anti-histag antibody in Western blot. (C) Proteins bound to dog erythrocytes detected in Western blot with anti-histag antibody.

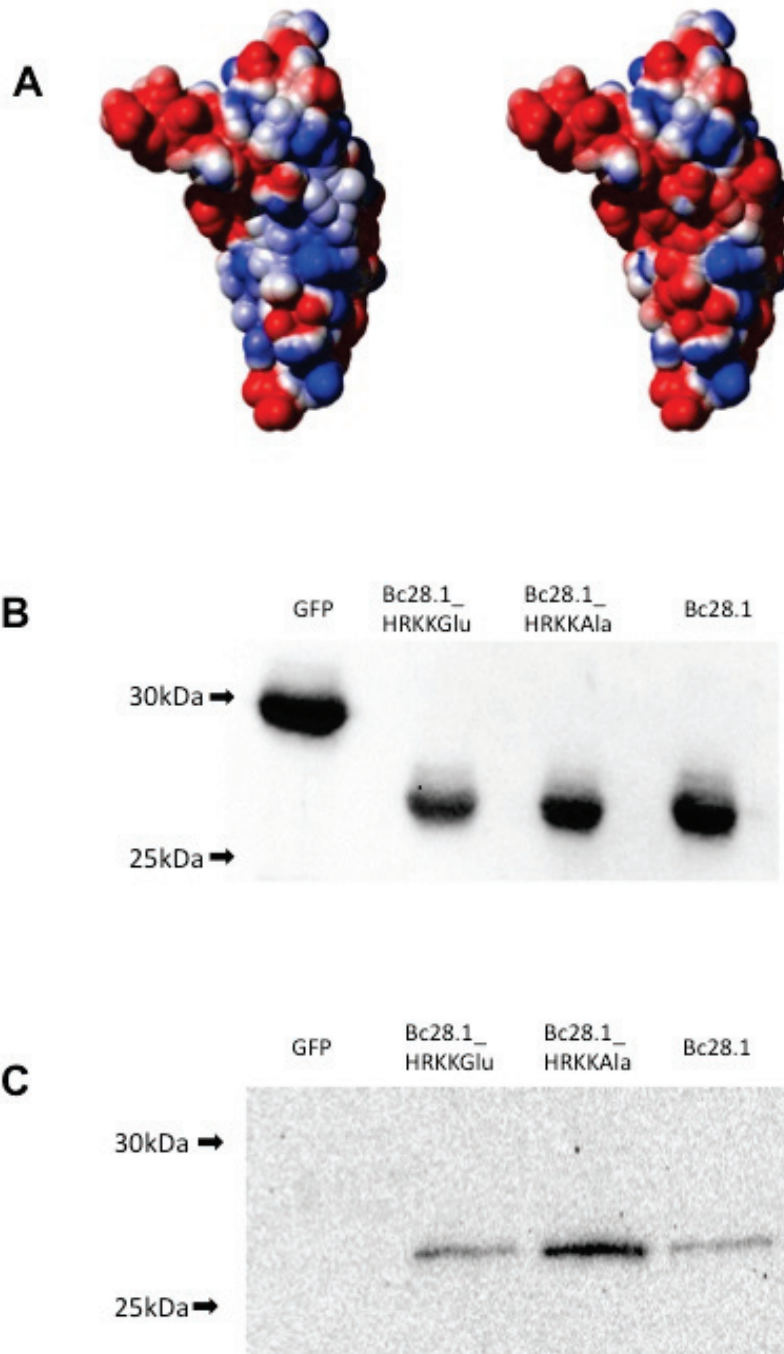

Supplement: supp_M111.260745_jbc.M111.260745-3.pdf [file supp_M111.260745_jbc.M111.260745-3.pdf]
